# Supplementary material for: Topology of silica supported vanadium–titanium oxide catalysts for oxidative dehydrogenation of propane
Source: Royal Society of Chemistry journal article supplement (doi:10.1039/c2cy00541g), 2012-01-01
Supplement: c2cy00541g.pdf [file c2cy00541g.pdf]

# Supporting Information

for the manuscript

## Topology of silica supported vanadium-titanium oxide catalysts for oxidative dehydrogenation of propane

Neil Hamilton, Till Wolfram, Genka Tzolova Müller, Michael Hävecker<sup>1</sup>, Jutta Kröhnert,  
Carlos Carrero<sup>2</sup>, Reinhard Schomäcker<sup>2</sup>  
Annette Trunschke\*, and Robert Schlögl

Department of Inorganic Chemistry, Fritz Haber Institute of the Max Planck Society,  
Faradayweg 4-6, 14195 Berlin, Germany.

<sup>1</sup> – Department of Solar Energy Research, Helmholtz-Zentrum  
Berlin/BESSY II, Albert-Einstein-Str. 15, 12489 Berlin, Germany

<sup>2</sup> – Technical University Berlin, Department of Chemistry,  
Strasse des 17. Juni 124, 10623 Berlin, Germany

E-mail: [trunschke@fhi-berlin.mpg.de](mailto:trunschke@fhi-berlin.mpg.de)

Table S1: Summary of chemical analysis and microstructural details for prepared catalysts

| ID    | Sample        | V [wt%] | V [mmol/g <sub>cat</sub> ] | Ti [wt %] | Ti [mmol/g <sub>cat</sub> ] | Total [wt%] | Total [mmol/g <sub>cat</sub> ] | SBA-15 / Ti/SBA-15 mother | Pore diameter [nm] | S(BET) [m <sup>2</sup> /g] | Micropore area [m <sup>2</sup> /g] | SAXRD a <sub>0</sub> [nm] | Wall thickness [nm] | Metal oxide layer thickness [nm] |
|-------|---------------|---------|----------------------------|-----------|-----------------------------|-------------|--------------------------------|---------------------------|--------------------|----------------------------|------------------------------------|---------------------------|---------------------|----------------------------------|
| 7495  | SBA-15        | 0.00    | 0.00                       | 0.00      | 0.00                        | 0.00        | 0.00                           | X                         | 7.31               | 978.0                      | 427.0                              | 11.22                     | 3.91                | 0.00                             |
| 7569  | 3Ti/SBA-15    | 0.00    | 0.00                       | 3.36      | 0.70                        | 3.36        | 0.70                           | 7495                      | 7.03               | 823.0                      | 316.0                              | 10.97                     | 3.94                | 0.01                             |
| 7622  | 8Ti/SBA-15    | 0.00    | 0.00                       | 8.31      | 1.74                        | 8.31        | 1.74                           | 7495                      | 6.79               | 806.0                      | 292.0                              | 10.96                     | 4.17                | 0.13                             |
| 7606  | 1V/3Ti/SBA-15 | 0.98    | 0.19                       | 3.29      | 0.69                        | 4.27        | 0.88                           | 7495/ 7569                | 7.03               | 757.0                      | 293.0                              | 10.96                     | 3.93                | 0.01                             |
| 7620  | 4V/3Ti/SBA-15 | 3.75    | 0.74                       | 3.11      | 0.65                        | 6.86        | 1.39                           | 7495/ 7569                | 7.03               | 623.0                      | 192.0                              | 10.94                     | 3.91                | 0.00                             |
| 7624  | 4V/8Ti/SBA-15 | 3.81    | 0.75                       | 7.61      | 1.59                        | 11.42       | 2.34                           | 7495/ 7622                | 6.79               | 317.0                      | 79.0                               | 10.84                     | 4.05                | 0.07                             |
|       |               |         |                            |           |                             |             |                                |                           |                    |                            |                                    |                           |                     |                                  |
| 7514  | SBA-15        | 0.00    | 0.00                       | 0.00      | 0.00                        | 0.00        | 0.00                           | X                         | 7.31               | 886.0                      | 350.0                              | 10.80                     | 3.49                | 0.00                             |
| 7724  | SBA-15        | 0.00    | 0.00                       | 0.00      | 0.00                        | 0.00        | 0.00                           | X                         | 7.31               | 987.0                      | 381.0                              | 10.90                     | 3.59                | 0.00                             |
| 7751  | SBA-15        | 0.00    | 0.00                       | 0.00      | 0.00                        | 0.00        | 0.00                           | X                         | 7.31               | 701.0                      | 210.0                              | 11.00                     | 3.69                | 0.00                             |
| 7671  | 1Ti/SBA-15    | 0.00    | 0.00                       | 0.90      | 0.19                        | 0.90        | 0.19                           | 7514                      | 6.79               | 841.0                      | 332.0                              | 10.83                     | 4.04                | 0.27                             |
| 7674  | 2Ti/SBA-15    | 0.00    | 0.00                       | 1.82      | 0.38                        | 1.82        | 0.38                           | 7514                      | 7.03               | 750.0                      | 303.0                              | 10.82                     | 3.79                | 0.15                             |
| 7676  | 3Ti/SBA-15    | 0.00    | 0.00                       | 3.35      | 0.70                        | 3.35        | 0.70                           | 7514                      | 7.03               | 815.0                      | 317.0                              | 10.84                     | 3.81                | 0.16                             |
| 7688  | 7Ti/SBA-15    | 0.00    | 0.00                       | 6.81      | 1.42                        | 6.81        | 1.42                           | 7514                      | 7.03               | 652.0                      | 212.0                              | 10.84                     | 3.81                | 0.16                             |
| 7731  | 9Ti/SBA-15    | 0.00    | 0.00                       | 9.20      | 1.92                        | 9.20        | 1.92                           | 7724                      | 6.79               | 755.0                      | 263.0                              | 10.91                     | 4.12                | 0.26                             |
| 7734  | 14Ti/SBA-15   | 0.00    | 0.00                       | 14.08     | 2.94                        | 14.08       | 2.94                           | 7724                      | 2 peaks            | 651.0                      | 186.0                              | 10.86                     | n/a                 | n/a                              |
| 7779  | 1V/SBA-15     | 0.99    | 0.20                       | 0.00      | 0.00                        | 0.99        | 0.20                           | 7724                      | 7.03               | 939.0                      | 345.0                              | 10.97                     | 3.94                | 0.17                             |
| 7802  | 2V/SBA-15     | 1.77    | 0.35                       | 0.00      | 0.00                        | 1.77        | 0.35                           | 7724                      | 7.03               | 926.0                      | 335.0                              | 10.92                     | 3.89                | 0.15                             |
| 7815  | 3.5V/SBA-15   | 3.45    | 0.68                       | 0.00      | 0.00                        | 3.45        | 0.68                           | 7751                      | 7.31               | 807.0                      | 212.0                              | 10.89                     | 3.58                | 0.00                             |
|       |               |         |                            |           |                             |             |                                |                           |                    |                            |                                    |                           |                     |                                  |
| 7817  | 6.5V/SBA-15   | 6.34    | 1.24                       | 0.00      | 0.00                        | 6.34        | 1.24                           | 7751                      | 7.31               | 679.0                      | 129.0                              | 10.89                     | 3.58                | 0.00                             |
|       |               |         |                            |           |                             |             |                                |                           |                    |                            |                                    |                           |                     |                                  |
| 7827  | 9V/SBA-15     | 9.15    | 1.80                       | 0.00      | 0.00                        | 9.15        | 1.80                           | 7751                      | 7.03               | 529.0                      | 80.0                               | 10.89                     | 3.85                | 0.08                             |
|       |               |         |                            |           |                             |             |                                |                           |                    |                            |                                    |                           |                     |                                  |
| 9093  | SBA-15        | 0.00    | 0.00                       | 0.00      | 0.00                        | 0.00        | 0.00                           | X                         | 7.31               | 821.2                      | 257.5                              | 10.84                     | 3.53                | 0.00                             |
| 9181  | 4V/SBA-15     | 3.56    | 0.70                       | 0.00      | 0.00                        | 3.56        | 0.70                           | 9093                      | 7.31               | 773.5                      | 191.0                              | 10.91                     | 3.60                | 0.04                             |
| 9183  | 4V/SBA-15     | 3.91    | 0.77                       | 0.00      | 0.00                        | 3.91        | 0.77                           | 9093                      | 7.31               | 748.6                      | 182.1                              | 10.94                     | 3.63                | 0.01                             |
| 9575  | 1Ti/SBA-15    | 0.00    | 0.00                       | 0.92      | 0.19                        | 0.92        | 0.19                           | 9093                      | 7.31               | 921.2                      | 293.9                              | 10.90                     | 3.59                | 0.03                             |
| 10429 | 4V/1Ti/SBA-15 | 4.18    | 0.82                       | 1.17      | 0.24                        | 5.35        | 1.06                           | 9093/ 9575                | 7.31               | 680.4                      | 163.6                              | 10.90                     | 3.59                | 0.00                             |
|       |               |         |                            |           |                             |             |                                |                           |                    |                            |                                    |                           |                     |                                  |
| 8759  | SBA-15        | 0.00    | 0.00                       | 0.00      | 0.00                        | 0.00        | 0.00                           | X                         | 6.79               | 812.3                      | 347.8                              | 10.60                     | 3.81                | 0.00                             |
| 9576  | 2Ti/SBA-15    | 0.00    | 0.00                       | 1.74      | 0.36                        | 1.74        | 0.36                           | 8759                      | 6.79               | 752.2                      | 315.5                              | 10.59                     | 3.80                | 0.00                             |
| 10190 | 1V/2Ti/SBA-15 | 0.80    | 0.16                       | 1.75      | 0.37                        | 2.55        | 0.52                           | 8759/ 9576                | 6.79               | 704.1                      | 280.7                              | 10.63                     | 3.84                | 0.02                             |

|       |                |      |      |       |      |       |      |             |      |       |       |       |      |      |
|-------|----------------|------|------|-------|------|-------|------|-------------|------|-------|-------|-------|------|------|
| 10205 | 3V/2Ti/SBA-15  | 2.76 | 0.54 | 1.67  | 0.35 | 4.43  | 0.89 | 8759/ 9576  | 6.79 | 664.7 | 245.6 | 10.56 | 3.77 | 0.00 |
| 10207 | 4V/2Ti/SBA-15  | 3.44 | 0.68 | 1.69  | 0.35 | 5.13  | 1.03 | 8759/ 9576  | 6.79 | 600.7 | 195.8 | 10.56 | 3.77 | 0.00 |
| 10209 | 6V/2Ti/SBA-15  | 5.66 | 1.11 | 1.60  | 0.33 | 7.26  | 1.45 | 8759/ 9576  | 6.79 | 542.6 | 160.1 | 10.53 | 3.74 | 0.00 |
|       |                |      |      |       |      |       |      |             |      |       |       |       |      |      |
| 8814  | SBA-15         | 0.00 | 0.00 | 0.00  | 0.00 | 0.00  | 0.00 | X           | 7.31 | 881.8 | 332.0 | 10.93 | 3.62 | 0.00 |
| 8871  | 3Ti/SBA-15     | 0.00 | 0.00 | 3.17  | 0.66 | 3.17  | 0.66 | 8814        | 7.03 | 814.0 | 305.6 | 10.88 | 3.85 | 0.11 |
| 9018  | 1V/3Ti/SBA-15  | 1.27 | 0.25 | 3.04  | 0.64 | 4.31  | 0.88 | 8814/ 8871  | 7.03 | 725.6 | 251.8 | 10.88 | 3.85 | 0.11 |
| 9019  | 2V/3Ti/SBA-15  | 2.19 | 0.43 | 3.03  | 0.63 | 5.22  | 1.06 | 8814/ 8871  | 7.03 | 707.6 | 240.7 | 10.87 | 3.84 | 0.11 |
| 9020  | 3V/3Ti/SBA-15  | 3.21 | 0.63 | 2.99  | 0.62 | 6.20  | 1.25 | 8814/ 8871  | 7.03 | 656.8 | 202.9 | 10.85 | 3.82 | 0.10 |
| 9021  | 6V/3Ti/SBA-15  | 6.09 | 1.20 | 2.79  | 0.58 | 8.88  | 1.78 | 8814/ 8871  | 7.03 | 498.1 | 113.1 | 10.74 | 3.71 | 0.04 |
|       |                |      |      |       |      |       |      |             |      |       |       |       |      |      |
| 8886  | SBA-15         | 0.00 | 0.00 | 0.00  | 0.00 | 0.00  | 0.00 | X           | 7.03 | 849.1 | 305.2 | 10.47 | 3.44 | 0.00 |
| 9238  | 11Ti/SBA-15    | 0.00 | 0.00 | 10.97 | 2.29 | 10.97 | 2.29 | 8886        | 6.56 | 596.1 | 177.7 | 10.44 | 3.88 | 0.22 |
| 9240  | 14Ti/SBA-15    | 0.00 | 0.00 | 13.97 | 2.92 | 13.97 | 2.92 | 8886        | 6.56 | 527.6 | 148.4 | 10.33 | 3.77 | 0.17 |
| 9507  | 4V/13Ti/SBA-15 | 4.35 | 0.85 | 12.70 | 2.65 | 17.05 | 3.51 | 8886/ 9240  | 6.32 | 395.4 | 46.2  | 10.32 | 4.00 | 0.28 |
| 9514  | 17Ti/SBA-15    | 0.00 | 0.00 | 16.71 | 3.49 | 16.71 | 3.49 | 8886        | 6.56 | 439.4 | 104.0 | 10.29 | 3.73 | 0.15 |
| 12478 | 2V/17Ti/SBA-15 | 1.81 | 0.36 | 16.89 | 3.53 | 18.70 | 3.88 | 9514        | 6.08 | 372.5 | 98.2  | 10.15 | 4.07 | 0.09 |
| 12479 | 4V/17Ti/SBA-15 | 3.87 | 0.76 | 16.25 | 3.40 | 20.12 | 4.15 | 9514        | 5.88 | 345.1 | 62.3  | 10.14 | 4.26 | 0.19 |
| 12480 | 6V/17Ti/SBA-15 | 6.46 | 1.27 | 14.71 | 3.07 | 21.17 | 4.34 | 9514        | 6.32 | 330.6 | 96.3  | 10.22 | 3.90 | 0.01 |
|       |                |      |      |       |      |       |      |             |      |       |       |       |      |      |
| 9179  | SBA-15         | 0.00 | 0.00 | 0.00  | 0.00 | 0.00  | 0.00 | X           | 6.56 | 757.9 | 307.7 | 10.30 | 3.74 | 0.00 |
| 9809  | 7Ti/SBA-15     | 0.00 | 0.00 | 6.68  | 1.40 | 6.68  | 1.40 | 9179        | 6.56 | 648.2 | 233.6 | 10.23 | 3.67 | 0.00 |
| 9811  | 11Ti/SBA-15    | 0.00 | 0.00 | 11.00 | 2.30 | 11.00 | 2.30 | 9179        | 6.32 | 574.3 | 183.4 | 10.20 | 3.88 | 0.10 |
| 10283 | 17Ti/SBA-15    | 0.00 | 0.00 | 17.51 | 3.66 | 17.51 | 3.66 | 9179        | 5.88 | 442.7 | 66.7  | 10.20 | 4.32 | 0.29 |
| 10312 | 19Ti/SBA-15    | 0.00 | 0.00 | 19.35 | 4.04 | 19.35 | 4.04 | 9179        | 5.88 | 404.0 | 19.2  | 10.17 | 4.29 | 0.27 |
| 10314 | 21Ti/SBA-15    | 0.00 | 0.00 | 20.99 | 4.39 | 20.99 | 4.39 | 9179        | 5.88 | 372.5 | 0.4   | 10.14 | 4.26 | 0.29 |
| 9846  | 14Ti/SBA-15    | 0.00 | 0.00 | 14.48 | 3.03 | 14.48 | 3.03 | 9179        | 6.08 | 503.9 | 143.5 | 10.23 | 4.15 | 0.23 |
| 10179 | 1V/14Ti/SBA-15 | 0.56 | 0.11 | 14.04 | 2.93 | 14.60 | 3.04 | 9179/ 9846  | 6.08 | 493.7 | 129.4 | 10.21 | 4.13 | 0.22 |
| 10180 | 2V/14Ti/SBA-15 | 1.48 | 0.29 | 13.74 | 2.87 | 15.22 | 3.16 | 9179/ 9846  | 6.08 | 466.3 | 106.9 | 10.21 | 4.13 | 0.22 |
| 10181 | 3V/14Ti/SBA-15 | 2.92 | 0.57 | 13.43 | 2.81 | 16.35 | 3.38 | 9179/ 9846  | 6.08 | 435.4 | 84.9  | 10.23 | 4.15 | 0.23 |
| 9954  | 4V/14Ti/SBA-15 | 4.04 | 0.79 | 13.19 | 2.76 | 17.23 | 3.55 | 9179/ 9846  | 5.88 | 427.7 | 76.1  | 10.23 | 4.35 | 0.23 |
| 10182 | 6V/14Ti/SBA-15 | 5.71 | 1.12 | 12.62 | 2.64 | 18.33 | 3.76 | 9179/ 9846  | 5.88 | 349.7 | 0.0   | 10.19 | 4.31 | 0.31 |
| 10380 | 23Ti/SBA-15    | 0.00 | 0.00 | 22.62 | 4.73 | 22.62 | 4.73 | 9179        | 5.68 | 358.4 | 0.0   | 10.05 | 4.37 | 0.34 |
| 10413 | 1V/23Ti/SBA-15 | 0.86 | 0.17 | 22.11 | 4.62 | 22.97 | 4.79 | 9179/ 10380 | 5.48 | 305.9 | 21.7  | 10.03 | 4.55 | 0.40 |
| 10415 | 2V/23Ti/SBA-15 | 2.00 | 0.39 | 21.57 | 4.51 | 23.57 | 4.90 | 9179/ 10380 | 5.48 | 293.0 | 17.2  | 10.02 | 4.54 | 0.43 |
| 10417 | 3V/23Ti/SBA-15 | 3.21 | 0.63 | 21.08 | 4.40 | 24.29 | 5.03 | 9179/ 10380 | 5.29 | 300.9 | 8.5   | 10.06 | 4.78 | 0.45 |

|       |                |      |      |       |      |       |      |             |      |       |       |       |      |      |
|-------|----------------|------|------|-------|------|-------|------|-------------|------|-------|-------|-------|------|------|
| 10419 | 4V/23Ti/SBA-15 | 4.51 | 0.89 | 20.50 | 4.28 | 25.01 | 5.17 | 9179/ 10380 | 5.29 | 270.7 | 0.0   | 10.03 | 4.75 | 0.21 |
| 10421 | 7V/23Ti/SBA-15 | 6.58 | 1.29 | 19.76 | 4.13 | 26.34 | 5.42 | 9179/ 10380 | 5.29 | 221.7 | 0.0   | error | n/a  | n/a  |
|       |                |      |      |       |      |       |      |             |      |       |       |       |      |      |
| 11780 | SBA-15         | 0.00 | 0.00 | 0.00  | 0.00 | 0.00  | 0.00 | X           | 7.06 | 817.7 | 314.4 | 10.97 | 3.91 | 0.00 |
| 11807 | 7Ti/SBA-15     | 0.00 | 0.00 | 6.96  | 1.45 | 6.96  | 1.45 | 11780       | 7.04 | 580.8 | 177.0 | 10.73 | 3.69 | 0.00 |
| 11815 | 12Ti/SBA-15    | 0.00 | 0.00 | 11.56 | 2.42 | 11.56 | 2.42 | 11780       | 6.72 | 441.2 | 82.3  | 10.57 | 3.85 | 0.00 |
| 11817 | 15Ti/SBA-15    | 0.00 | 0.00 | 14.72 | 3.08 | 14.72 | 3.08 | 11780       | 6.59 | 394.8 | 67.8  | 10.52 | 3.93 | 0.01 |
| 11827 | 17Ti/SBA-15    | 0.00 | 0.00 | 17.06 | 3.56 | 17.06 | 3.56 | 11780       | 6.49 | 364.7 | 54.2  | 10.47 | 3.98 | 0.03 |
| 11836 | 19Ti/SBA-15    | 0.00 | 0.00 | 19.16 | 4.00 | 0.00  | 4.00 | 11780       | 6.38 | 307.9 | 45.6  | 10.44 | 4.06 | 0.07 |
| 11838 | 20Ti/SBA-15    | 0.00 | 0.00 | 20.25 | 4.23 | 20.25 | 4.23 | 11780       | 6.37 | 302.8 | 48.9  | 10.43 | 4.06 | 0.07 |
| 11840 | 21Ti/SBA-15    | 0.00 | 0.00 | 21.09 | 4.41 | 21.09 | 4.41 | 11780       | 6.18 | 288.9 | 31.4  | 10.39 | 4.21 | 0.15 |
| 11876 | 22.5Ti/SBA-15  | 0.00 | 0.00 | 22.50 | 4.70 | 22.50 | 4.70 | 11780       | 6.07 | 280.4 | 11.9  | 10.36 | 4.29 | 0.19 |
| 11886 | 23Ti/SBA-15    | 0.00 | 0.00 | 23.28 | 4.86 | 23.28 | 4.86 | 11780       | 5.96 | 266.8 | 15.8  | 10.36 | 4.40 | 0.24 |

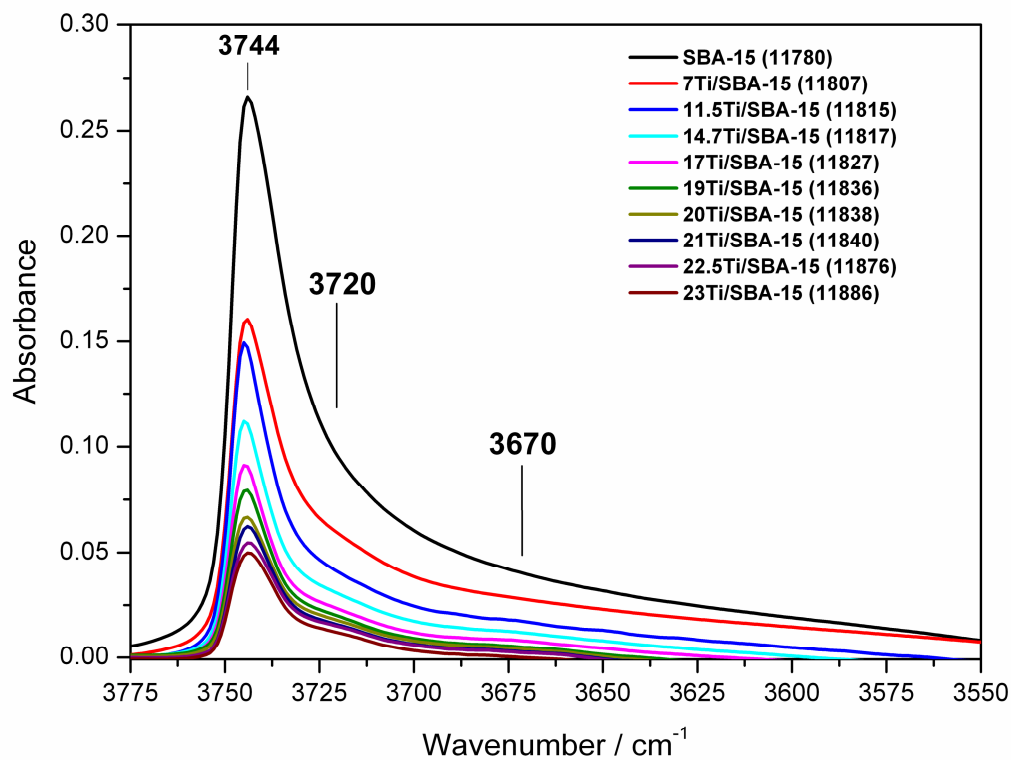

Figure S1: FTIR spectra of selected Ti/SBA-15 catalysts after activation in 200 mbar O<sub>2</sub> at 723 K for a period of 1 h. Spectra are normalized according to areal density of the wafers used. Sample ID numbers are indicated in the figure legend.

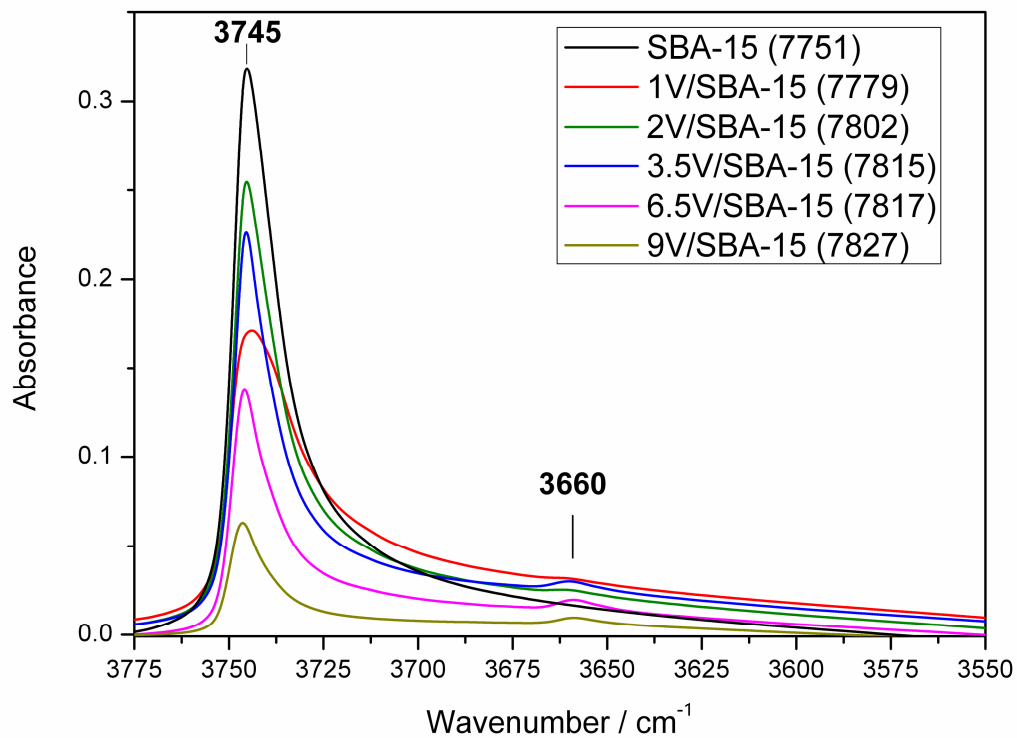

S2: FTIR spectra of selected V/SBA-15 catalysts after activation in 200 mbar  $\text{O}_2$  at 723 K for a period of 1 h. Spectra are normalized according to areal density of the wafers used. Sample ID numbers are indicated in the figure legend.

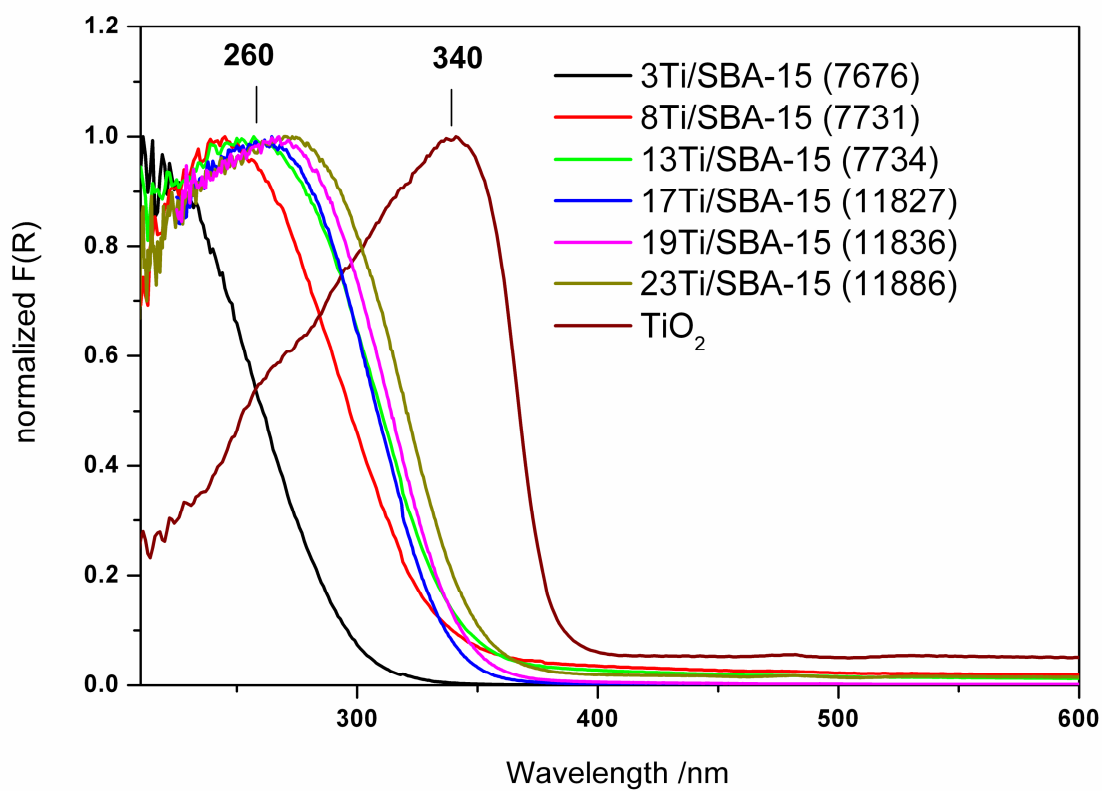

S3: Diffuse reflectance UV-vis spectra of selected Ti/SBA-15 samples after activation in flowing synthetic air at 723 K for a period of 1 h. Sample ID numbers are indicated in the figure legend.

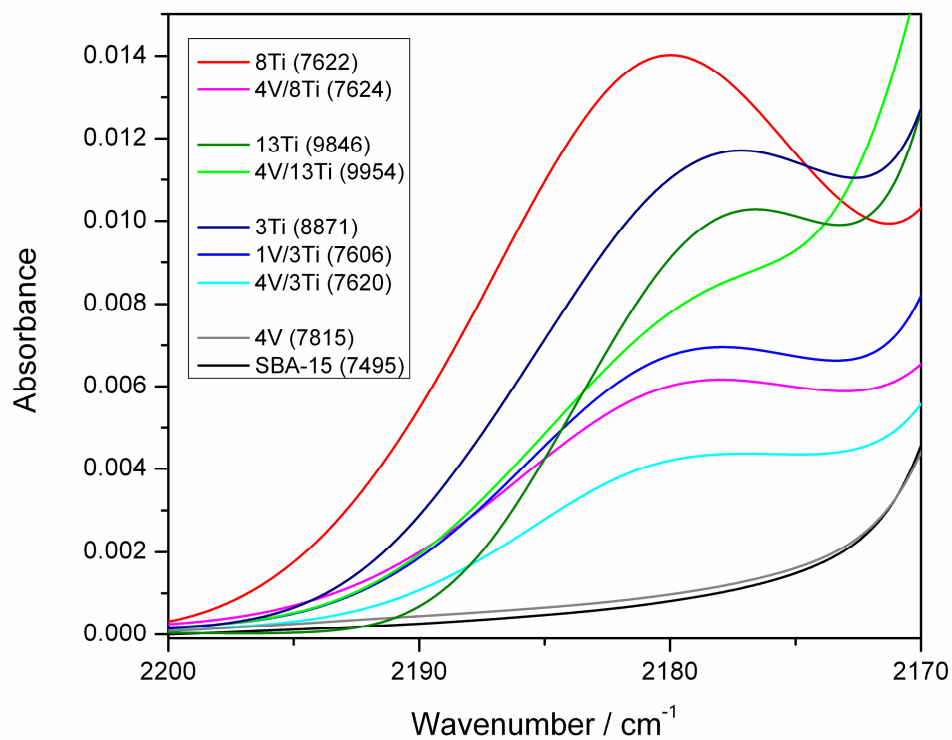

S4: FTIR spectra of CO adsorbed on various  $(\text{TiO}_x)_n/\text{SBA-15}$ ,  $(\text{VO}_x)_n/\text{SBA-15}$ , and  $(\text{VO}_x)_n$ - $(\text{TiO}_x)_n/\text{SBA-15}$  catalysts in the  $\nu_{C=O}$  region. Sample ID numbers are indicated in the figure legend.



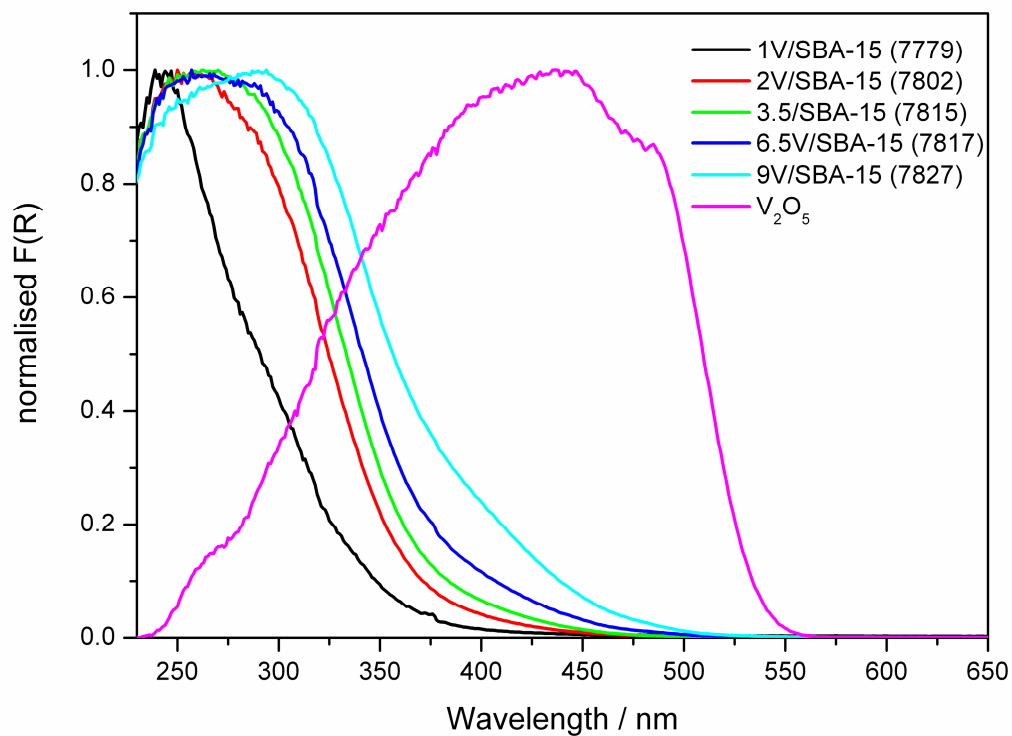

S5: Diffuse reflectance UV-vis spectra of selected V/SBA-15 samples after dehydration in flowing synthetic air at 723 K for a period of 1 h. Sample ID numbers are indicated in the figure legend.

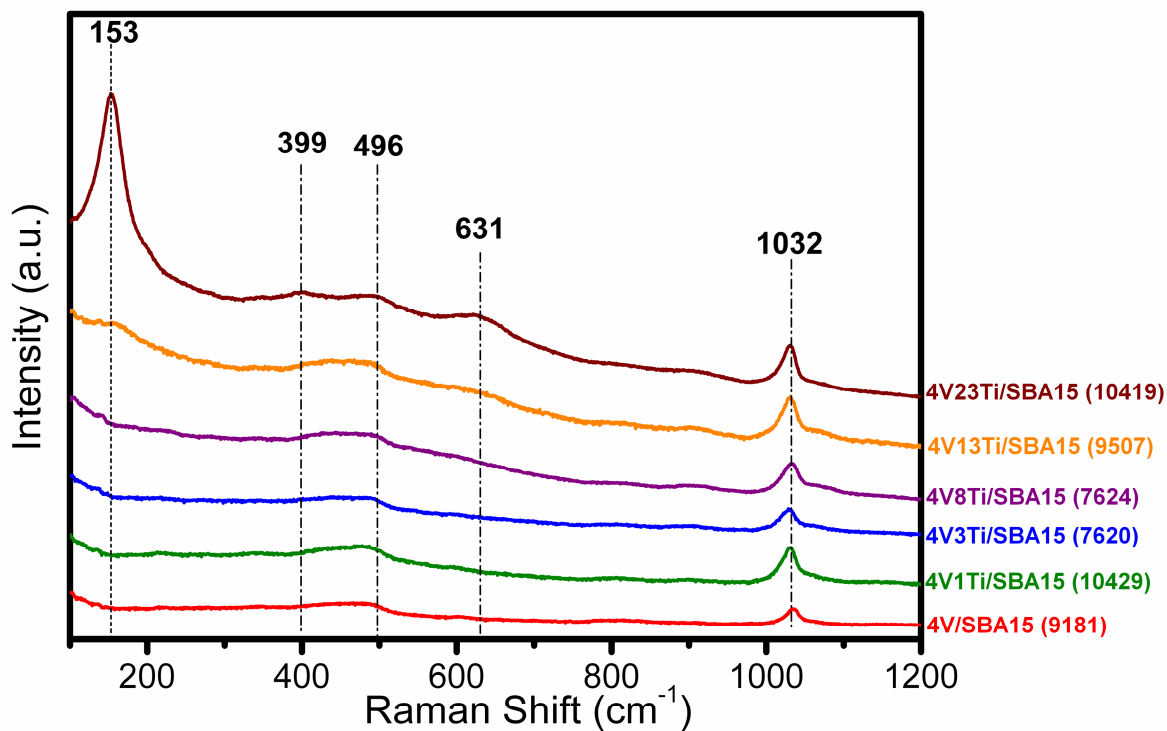

S6: Raman spectra of catalysts with 4 wt% vanadium with varying titanium content. Spectra were collected using 532 nm laser excitation source (Coherent Compass 315M-150, Nd:YAG double diode) with a power of 10 mW measured at the sample. Samples were located in an *in-situ* cell (Linkam TS1500) before being dehydrated at 723 K in flowing synthetic air for a period of 1 h. All spectra acquired at room temperature. Sample ID numbers are indicated in the figure legend.

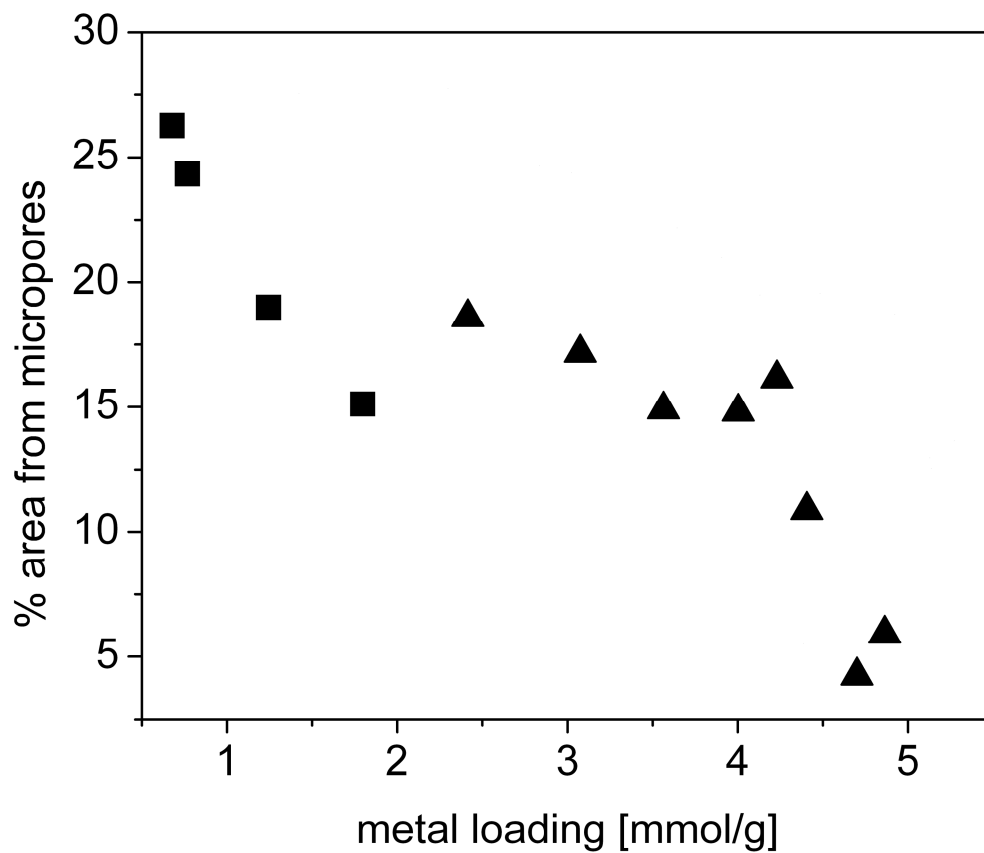

**S7:** Percentage contribution of microporosity to total specific surface area of V/SBA-15 (filled squares) and Ti/SBA-15 (filled triangles) catalyst samples as determined by t-plot analysis.
